# Supplementary material for: In-Situ Piezoelectric Effect for Augmenting Performance of Self-Powered ZnO-Based Photodetector
Source: MDPI journal article supplement (doi:10.3390/coatings13050921), 2023-05-14
Supplement: s1 [file s1]

Supplementary Information

# In-Situ Piezoelectric Effect for Augmenting Performance of Self-Powered ZnO-Based Photodetector

Thi My Huyen Nguyen and Chung Wung Bark \*

Department of Electrical Engineering, Gachon University, 1342 Seongnam-daero, Sujeong-gu, Seongnam-si 13120, Gyeonggi-do, Republic of Korea; myhuyen.dho.k12@gmail.com

\* Correspondence: bark@gachon.ac.kr

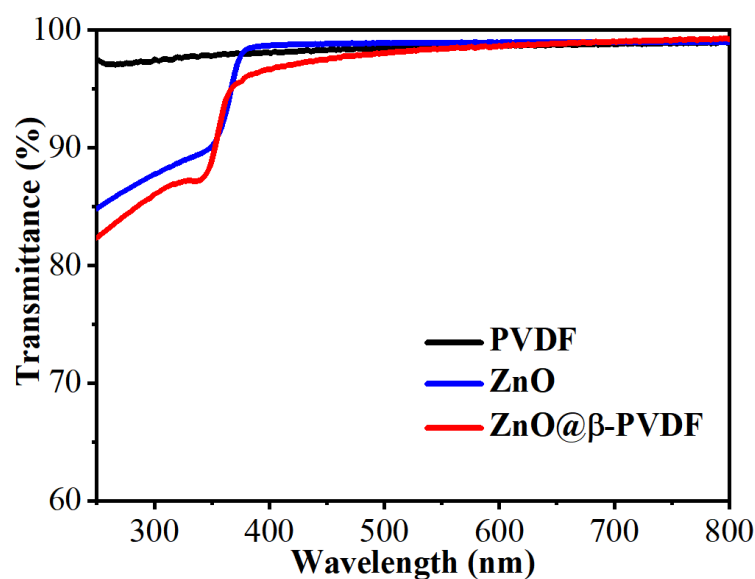

**Figure S1.** The transmittance spectra of 30 nm-thick  $\beta$ -PVDF, ZnO, and ZnO@ $\beta$ -PVDF samples.

**Citation:** Nguyen, T.M.H.; Bark, C.W. In-Situ Piezoelectric Effect for Augmenting Performance of Self-Powered ZnO-Based Photodetector. *Coatings* **2023**, *13*, 921. <https://doi.org/10.3390/coatings13050921>

Academic Editor: Peng Yu

Received: 19 April 2023

Revised: 9 May 2023

Accepted: 11 May 2023

Published: 14 May 2023

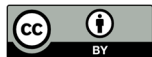

**Copyright:** © 2023 by the authors. Licensee MDPI, Basel, Switzerland. This article is an open access article distributed under the terms and conditions of the Creative Commons Attribution (CC BY) license (<https://creativecommons.org/licenses/by/4.0/>).

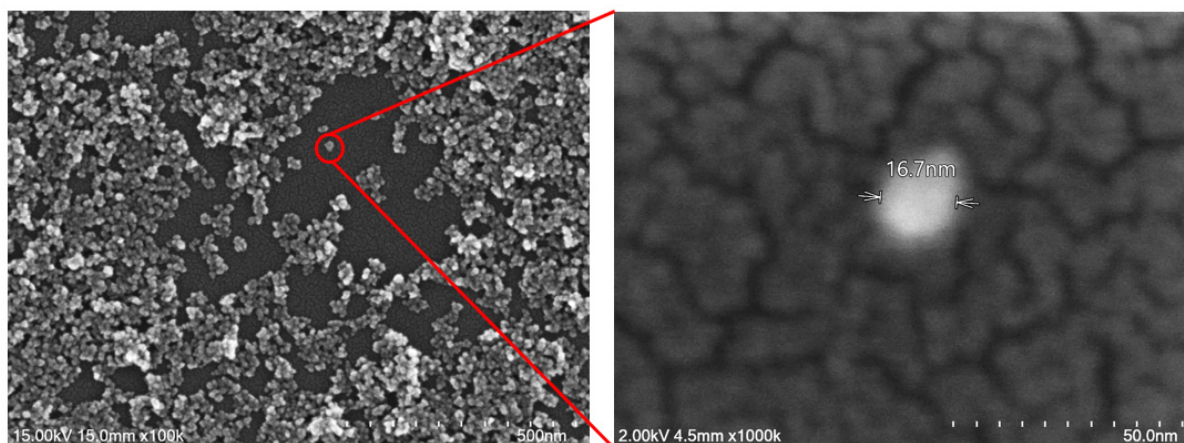

**Figure S2.** SEM image of ZnO nanoparticles loaded on a glass substrate (on the left) and an individual ZnO particle (on the right).

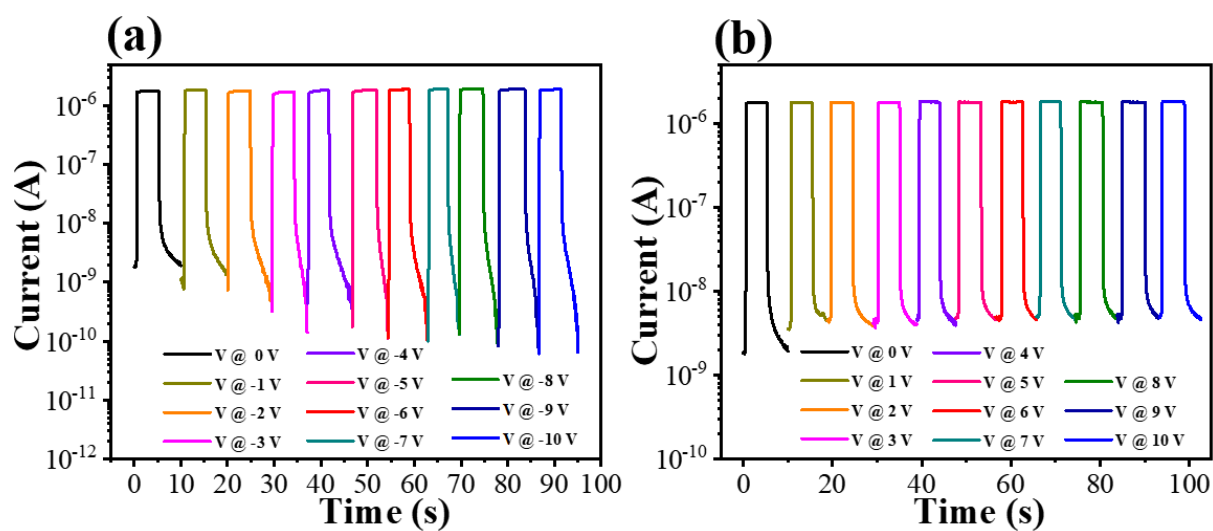

**Figure S3.** Logarithmic I-t curves of the photodetector under (a) reverse bias and (b) forward bias.
